# Supplementary material
Source: PubMed Central journal article supplement (PMC3613039)
Supplement: ACI-03-0404-s001.pdf [file ACI-03-0404-s001.pdf]

## Appendix A

### Scores Assigned to each Patient Record during the Control Experiments

| Patient Record ID | Mean Score* | Median Score* | Range      |
|-------------------|-------------|---------------|------------|
| 1                 | 6.5         | 6.0           | 4.0 – 9.0  |
| 2                 | 5.1         | 5.0           | 3.0 – 7.0  |
| 3                 | 5.7         | 5.5           | 2.0 – 9.0  |
| 4                 | 5.7         | 6.0           | 3.0 – 9.0  |
| 5                 | 7.2         | 7.5           | 4.0 - 9.0  |
| 6                 | 6.2         | 7.0           | 3.0 – 8.0  |
| 7 <sup>#</sup>    | 5.7         | 6.0           | 2.0 – 9.0  |
| 8                 | 6.0         | 6.0           | 3.0 – 10.0 |
| 9                 | 6.0         | 6.0           | 2.0 – 10.0 |

\*Patient records with mean and median scores > 6 were selected for the main experiments

# Patient record 7 and the associated clinical scenario depicted a hypoglycemic episode in a diabetic patient; this was a more common and relatively simple clinical case compared to the other records that were eliminated, which highlighted diagnoses like transient ischemic attack (patient record 2), COPD (patient record 3), iron deficiency anemia (patient record 4), rheumatoid arthritis (patient record 8) and pyelonephritis (patient record 9)
